# Supplementary material
Source: PubMed Central journal article supplement (PMC5984154)
Supplement: NIHMS953197-supplement-Supp_TableS1-2.pdf [file NIHMS953197-supplement-Supp_TableS1-2.pdf]

1

**Supplemental Table 1 for online appendix: Proton pump inhibitor medications and their standardized daily dose equivalences <sup>(16)</sup>**

|                 | <b>Total standard daily doses (mg)</b> | <b>Date became available over the counter</b> | <b>Over the counter dose (mg)</b> |
|-----------------|----------------------------------------|-----------------------------------------------|-----------------------------------|
| Omeprazole      | 20                                     | 6-20-2003                                     | 20                                |
| Pantoprazole    | 40                                     |                                               |                                   |
| Esomeprazole    | 20                                     | 3-28-2014                                     | 20                                |
| Lansoprazole    | 30                                     | 5-18-2009                                     | 15                                |
| Rabeprazole     | 20                                     |                                               |                                   |
| Dexlansoprazole | 30                                     |                                               |                                   |

2

3

4

5

6

7

8

9

10

11

12

13

14

15

16

17

18

19

20

21

22

23

24

25

26

27

28

29

30

31

32

33

**Supplementary Table 2 for online appendix: Results from the fully-adjusted model**

| Variable                          | Referent category                      | $\beta$ | SE   | HR          | 95% CI*             |
|-----------------------------------|----------------------------------------|---------|------|-------------|---------------------|
| Female                            |                                        | 0.65    | 0.10 | <b>1.92</b> | <b>(1.59-2.33)</b>  |
| Non-white                         |                                        | -0.14   | 0.06 | <b>0.87</b> | <b>(0.77-0.98)</b>  |
| Epilepsy                          |                                        | 0.76    | 0.37 | <b>2.14</b> | <b>(1.04-4.37)</b>  |
| Treated diabetes <sup>†</sup>     |                                        | -0.09   | 0.14 | 0.91        | (0.69-1.20)         |
| Treated hypertension <sup>†</sup> |                                        | -0.11   | 0.09 | 0.90        | (0.76-1.07)         |
| Depression                        |                                        | 0.00    | 0.13 | 1.00        | (0.78-1.29)         |
| Cognitive impariment              |                                        | -0.06   | 0.16 | 0.94        | (0.68 -1.29)        |
| Vision impairment                 |                                        | 0.01    | 0.08 | 1.02        | (0.86-1.20)         |
| History of stroke                 |                                        | 0.46    | 0.16 | <b>1.58</b> | <b>(1.16-2.16)</b>  |
| CHF                               |                                        | 0.00    | 0.15 | 1.00        | ( 0.74-1.35)        |
| Heart disease                     |                                        | 0.06    | 0.10 | 1.06        | (0.88-1.28)         |
| Low gait speed                    |                                        | 0.08    | 0.14 | 1.08        | (0.82-1.42)         |
| Difficulties with $\geq$ ADLS     |                                        | 0.18    | 0.10 | 1.19        | (0.98-1.44)         |
| Difficulties with $\geq$ IADLS    |                                        | 0.10    | 0.12 | 1.11        | (0.88-1.39)         |
| Regular exercise                  |                                        | 0.12    | 0.08 | 1.13        | (0.97-1.33)         |
| BMI                               | Referent $\leq$ 18.5 kg/m <sup>2</sup> |         |      |             |                     |
| BMI 18.5-24.9 kg/m <sup>2</sup>   |                                        | 0.10    | 0.31 | 1.11        | (0.60-2.04)         |
| BMI 25-29.9 kg/m <sup>2</sup>     |                                        | -0.16   | 0.31 | 0.85        | (0.46-1.58)         |
| BMI 30+ kg/m <sup>2</sup>         |                                        | -0.34   | 0.32 | 0.71        | (0.38 -1.33)        |
| Smoking                           | Referent=never                         |         |      |             |                     |
| Former                            |                                        | 0.06    | 0.08 | 1.07        | (0.91-1.24)         |
| Current                           |                                        | 0.15    | 0.19 | 1.16        | (0.80-1.69)         |
| Fair/poor self-rated health       |                                        | -0.07   | 0.11 | 0.94        | (0.76-1.15)         |
| Deyo-Charlson score               | Referent=0                             |         |      |             |                     |
| DC score=1                        |                                        | 0.09    | 0.10 | 1.09        | (0.90 -1.34)        |
| DC score=2                        |                                        | 0.10    | 0.12 | 1.11        | (0.88-1.40)         |
| DC score $\geq$ 3                 |                                        | 0.22    | 0.14 | 1.25        | (0.95-1.63)         |
| Fracture in past 5 years          |                                        | 0.63    | 0.14 | <b>1.88</b> | <b>(1.44 -2.45)</b> |
| Opioids <sup>‡</sup>              |                                        | 0.75    | 0.11 | <b>2.11</b> | <b>(1.69-2.64)</b>  |
| Anticonvulsants <sup>‡</sup>      |                                        | -0.01   | 0.27 | 0.99        | (0.58-1.69)         |
| Benzodiazepines <sup>‡</sup>      |                                        | 0.09    | 0.19 | 1.10        | (0.76-1.58)         |
| Prescription NSAIDs <sup>‡</sup>  |                                        | 0.47    | 0.15 | <b>1.59</b> | <b>(1.19-2.14)</b>  |
| Antidepressants <sup>‡</sup>      |                                        | 0.22    | 0.13 | 1.25        | (0.97-1.61)         |
| Thiazide diuretics <sup>‡</sup>   |                                        | -0.02   | 0.14 | 0.98        | (0.74-1.28)         |
| Bisphosphonates <sup>†</sup>      |                                        | 0.04    | 0.11 | 1.04        | (0.83-1.30)         |
| Corticosteroids <sup>†</sup>      |                                        | 0.09    | 0.10 | <b>1.19</b> | <b>(1.00-1.34)</b>  |

|                                          |       |      |      |             |
|------------------------------------------|-------|------|------|-------------|
| H2RAs <sup>†</sup>                       | -0.05 | 0.09 | 0.95 | (0.80-1.13) |
| Hormone replacement therapy <sup>†</sup> | -0.13 | 0.09 | 0.88 | (0.73-1.04) |
| <sup>x</sup> Age (quadratic spline)      | 0.05  | 0.05 | --   | --          |
| 65-70                                    | 0.00  | 0.00 | --   | --          |
| 70-75                                    | 0.00  | 0.01 | --   | --          |
| 75-80                                    | 0.00  | 0.01 | --   | --          |
| 80-85                                    | 0.00  | 0.01 | --   | --          |
| 85+                                      | 0.00  | 0.00 | --   | --          |

90 vs 65 year old: HR= 3.2 (95%CI: 0.70-14.73)

80 vs 65 year old: HR= 1.57 (95%CI: 0.78-3.15)

---

\*Bold type shows statistically significant result based on p-value.<sup>†</sup>Defined from computerized pharmacy data as filling  $\geq 2$  prescriptions (in what time period? Ever?),  
<sup>‡</sup>Defined from pharmacy data as having a fill within the prior 30 days. <sup>x</sup>HRs and corresponding 95% CIs from splines are non-interpretable and therefore are not presented here. To illustrate the pattern of risk based on age, we have calculated the HR of fracture comparing those who are 90 vs 65 years of age and those who are 80 vs 65 years of age keeping all other covariates constant. Holding all other covariates constant, 90 year olds have a 3.2 (95% CI: 0.70-14.73) times greater hazard of fracture than those who are 65 and 80 year olds have a 1.57 (95% CI:0.78-3.15) times greater hazard of fracture than those who are 65.

1  
2  
3  
4  
5  
6  
7  
8  
9  
10  
11  
12
